# Supplementary material
Source: Springer Nature journal article supplement (https://www.springermedizin.de/resource/supplementary/12985_2014_2499_MOESM2_ESM.pdf/9606874)

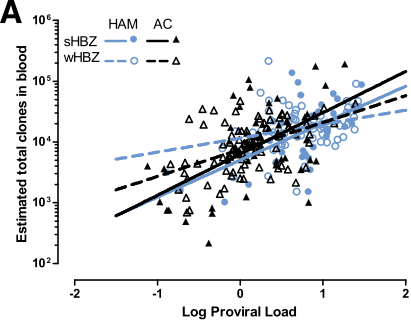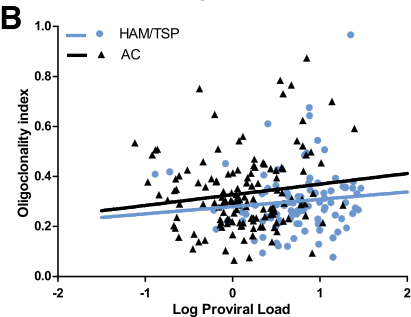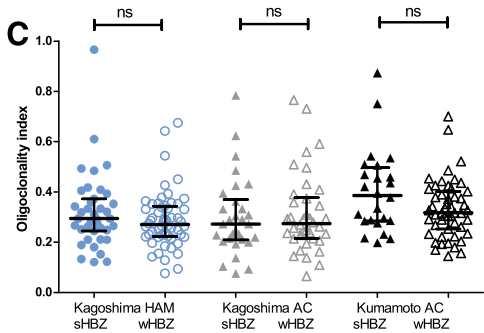

Supplement: MOESM2 [file 9606874]
